# Supplementary material
Source: PubMed Central journal article supplement (PMC7089412)
Supplement: 11262_2011_593_MOESM1_ESM.pdf [file 11262_2011_593_MOESM1_ESM.pdf]

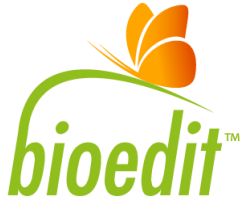

*Editing for Scientists  
by Scientists*  
Company no. 04150179  
(UK)

**BIOEDIT LIMITED**  
241 PARK LANE ,  
MACCLESFIELD,  
CHESHIRE SK11 8AA  
ENGLAND  
**Homepage:**<http://www.bioedit.co.uk>  
**E-mail:** [patrick@bioedit.com](mailto:patrick@bioedit.com)

**Editing Certificate**  
**Bioedit® LTD**

This is to certify that the manuscript entitled "Three clusters of bovine kobuvirus isolated in Korea, 2008–2010" by DJ An *et al.* was checked and edited by our editing service on the 21<sup>st</sup> February 2011. The editors were Claudia Copeland\* and Nicola Edwards\*.

Patrick Hughes

Bioedit® LTD.

\* *Information about our editors can be obtained at [www.bioedit.co.uk](http://www.bioedit.co.uk)*
